# Supplementary material for: Pyroptosis is driven by non-selective gasdermin-D pore and its morphology is different from MLKL channel-mediated necroptosis
Source: PubMed Central journal article supplement — Cell Res. 2016 Aug 30;26(9):1007–20. doi: 10.1038/cr.2016.100 (PMC5034106; doi:10.1038/cr.2016.100), 2016-08-30
Supplement: cr2016100x1.pdf [file cr2016100x1.pdf]

A

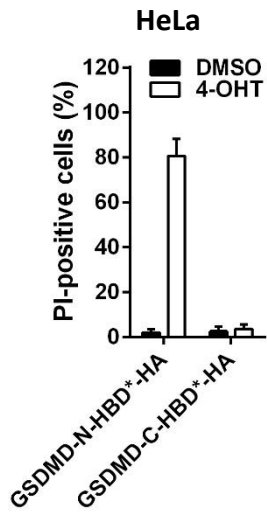

B

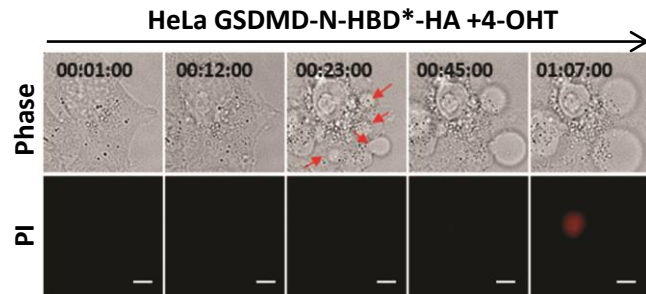

D

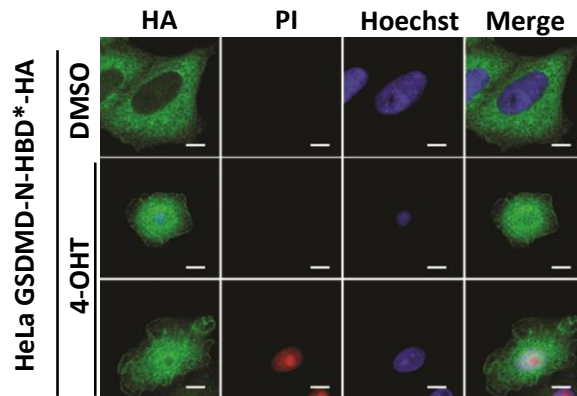

C

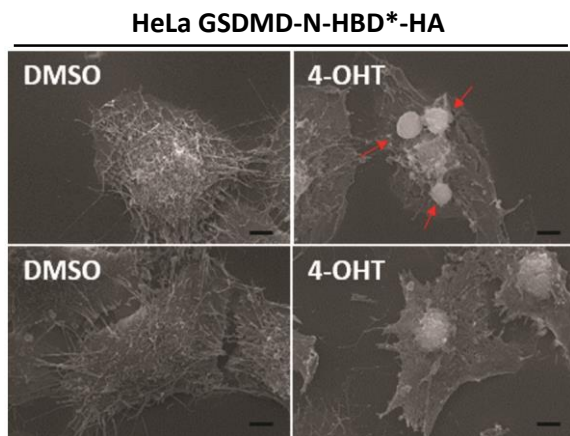

E

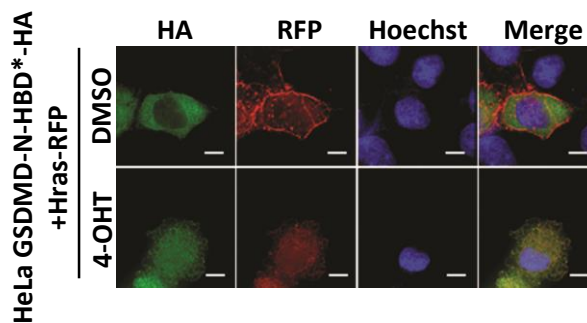

**Supplementary information, Figure S1** Forcing GSDMD-N together triggers pyroptosis in HeLa cells. (A-E) The same as **Figure 3A-3E** except that HeLa cells were used.
