# Supplementary material for: Pyroptosis is driven by non-selective gasdermin-D pore and its morphology is different from MLKL channel-mediated necroptosis
Source: PubMed Central journal article supplement — Cell Res. 2016 Aug 30;26(9):1007–20. doi: 10.1038/cr.2016.100 (PMC5034106; doi:10.1038/cr.2016.100), 2016-08-30
Supplement: cr2016100x2.pdf [file cr2016100x2.pdf]

**A**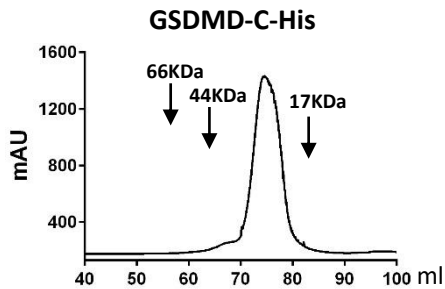**B**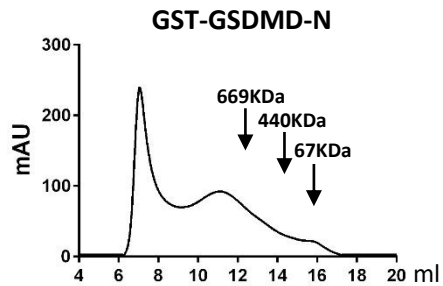

**Supplementary information, Figure S2** Recombinant GST-GSDMD-N forms oligomer whereas GSDMD-C-His is monomer. **(A, B)** Gel filtration analysis of purified recombinant proteins of GSDMD-C-His (Superdex 75, **A**) or GST-GSDMD-N (Superose 6, **B**). The elution positions of size standards are indicated.
