# Supplementary material for: Pyroptosis is driven by non-selective gasdermin-D pore and its morphology is different from MLKL channel-mediated necroptosis
Source: PubMed Central journal article supplement — Cell Res. 2016 Aug 30;26(9):1007–20. doi: 10.1038/cr.2016.100 (PMC5034106; doi:10.1038/cr.2016.100), 2016-08-30
Supplement: cr2016100x3.pdf [file cr2016100x3.pdf]

A

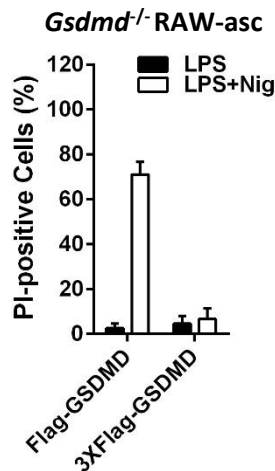

B

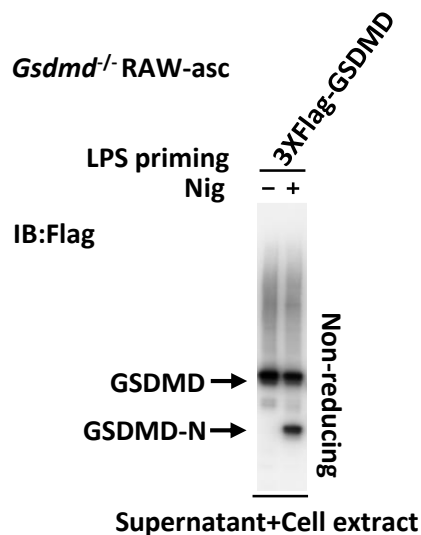

C

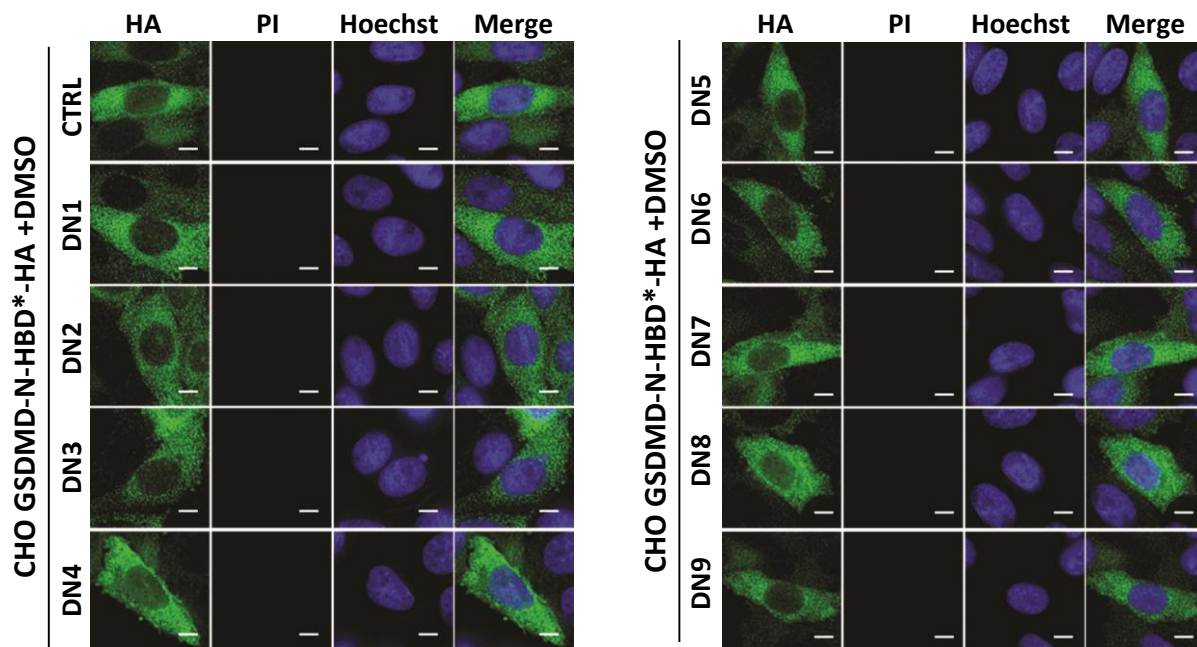

**Supplementary information, Figure S3** N-terminal structure is important for GSDMD-N to form oligomer and trigger pyroptosis. (A) Viabilities of *Gsdmd*<sup>-/-</sup> RAW-asc cells reconstituted with Flag-GSDMD and 3×Flag-GSDMD respectively after primed with LPS for 4 hours followed by no treatment or Nig stimulation. Data represent the mean ± s.d. of two independent experiments. (B) Immunoblot analysis of cell lysates of 3×Flag-GSDMD reconstituted *Gsdmd*<sup>-/-</sup> RAW-asc cells. 4%–12% gradient SDS-PAGE and non-reducing condition were used. (C) Deconvolution microscopy of DMSO-treated CHO cells expressing different GSDMD-N-HBD\*-HA deletion mutants. Cells were analyzed as **Figure 5D**. Scale bar, 5 μm.
