# Supplementary material for: Pyroptosis is driven by non-selective gasdermin-D pore and its morphology is different from MLKL channel-mediated necroptosis
Source: PubMed Central journal article supplement — Cell Res. 2016 Aug 30;26(9):1007–20. doi: 10.1038/cr.2016.100 (PMC5034106; doi:10.1038/cr.2016.100), 2016-08-30
Supplement: cr2016100x4.pdf [file cr2016100x4.pdf]

A

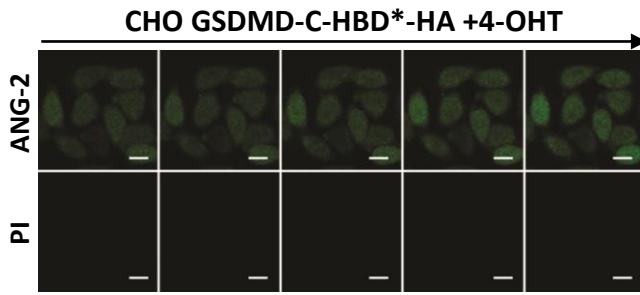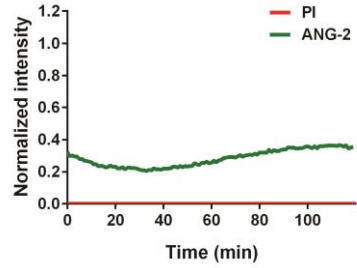

B

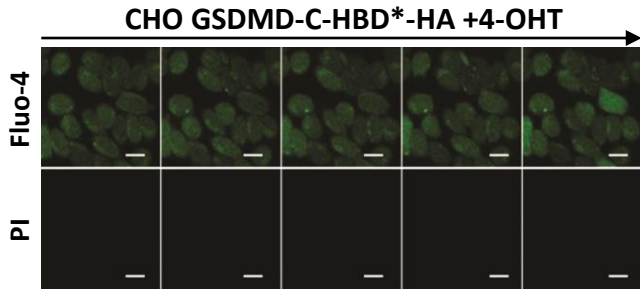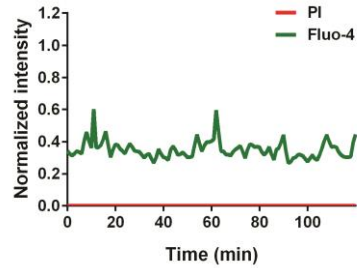

C

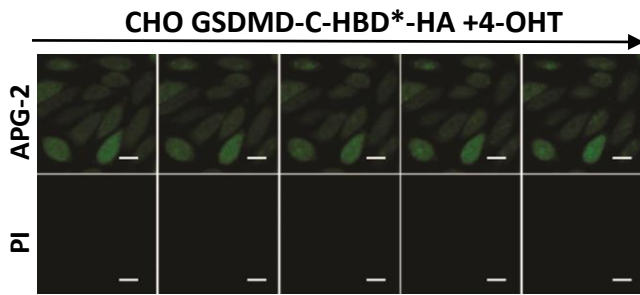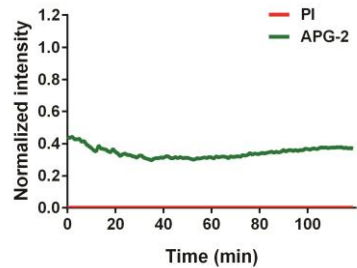

**Supplementary information, Figure S4** Ion influx/efflux did not occur in GSDMD-C-HBD\*-HA-expressing CHO cells treated with 4-OHT. (A-C) Representative time-lapse images of GSDMD-C-HBD\*-HA-expressing CHO cells treated with 4-OHT. Cells were preloaded with ANG-2 (A), Fluo-4 (B) or APG-2 (C) and cultured in PI-containing medium. Relative changes in individual ion indicator and PI fluorescence over time in one representative cell were shown in the right panel. Scale bar, 10  $\mu$ m.
